# Supplementary material for: Optimal balance: alkali metal-doped boron carbide nanosheets achieve superior stability and nonlinear optical responsiveness
Source: Royal Society of Chemistry journal article supplement (doi:10.1039/d4ra03882g), 2024-01-01
Supplement: d4ra03882g1.pdf [file d4ra03882g1.pdf]

## Supplementary Information

### **Optimal Balance: Alkali Metal-Doped Boron Carbide Nanosheets Achieve Superior Stability and Nonlinear Optical Responsiveness**

Junaid Yaqoob<sup>1</sup>, Hamad AlMohamadi<sup>2, 3</sup>, Asim Laeeq Khan<sup>2, 3</sup>, Muhammad Yasin<sup>4</sup>, Tariq Mahmood<sup>5, 6</sup>, Khurshid Ayub<sup>5</sup>, Farooq Anwar<sup>7,8</sup>, Khurram Saleem Joya<sup>9</sup>, Mazhar Amjad Gilani<sup>1\*</sup>

<sup>1</sup>Department of Chemistry, COMSATS University Islamabad, Lahore Campus, Lahore-54600, Pakistan

<sup>2</sup>Department of Chemical Engineering, Faculty of Engineering, Islamic University of Madinah, Madinah, Saudi Arabia

<sup>3</sup>Sustainability Research Center, Islamic University of Madinah, Madinah, Saudi Arabia

<sup>4</sup>Department of Chemical Engineering, COMSATS University Islamabad, Lahore Campus, Lahore-54600, Pakistan

<sup>5</sup>Department of Chemistry, COMSATS University Islamabad, Abbottabad Campus, Abbottabad-22060, Pakistan

<sup>6</sup>Department of Chemistry, College of Science, University of Bahrain, Sakhir P.O. Box 32038, Bahrain

<sup>7</sup>Department of Food Science, Faculty of Food Science and Technology, Universiti Putra Malaysia, 43400 UPM Serdang, Selangor, Malaysia

<sup>8</sup>Institute of Chemistry, University of Sargodha, Sargodha 40100, Pakistan

<sup>9</sup>Department of Chemistry, Faculty of Science, Islamic University of Madinah, Madinah 42351, Saudi Arabia

\*Corresponding Author

Mazhar Amjad Gilani

Email: [mazhargilani@cuilahore.edu.pk](mailto:mazhargilani@cuilahore.edu.pk)

**Li@BC nanosheet**

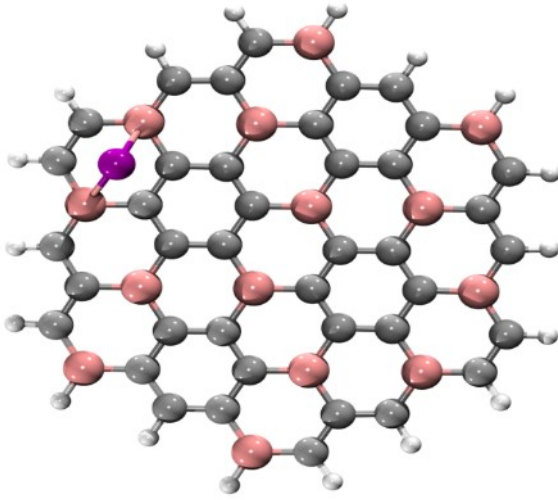

**Li@BC-B**

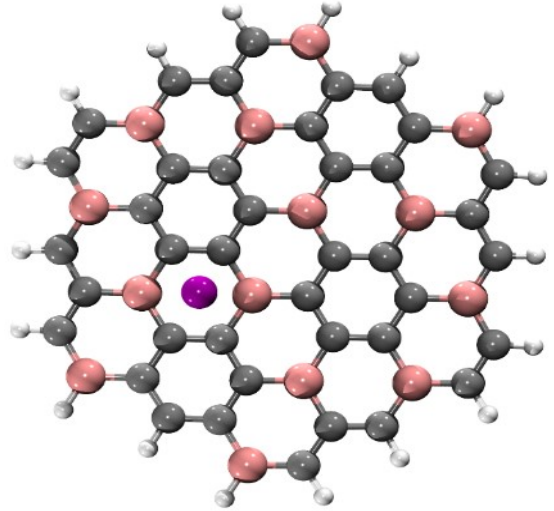

**Li@BC-C**

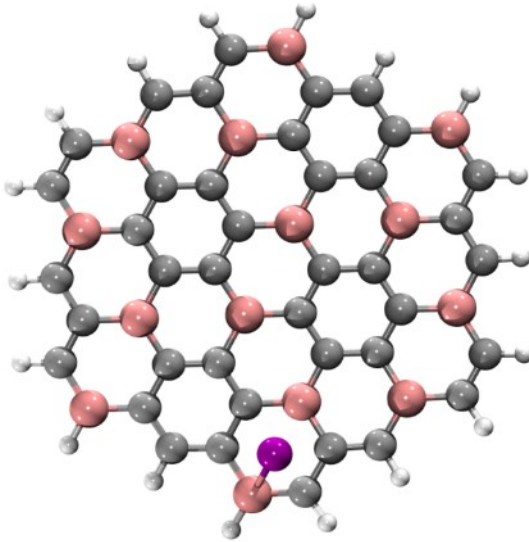

**Li@BC-D**

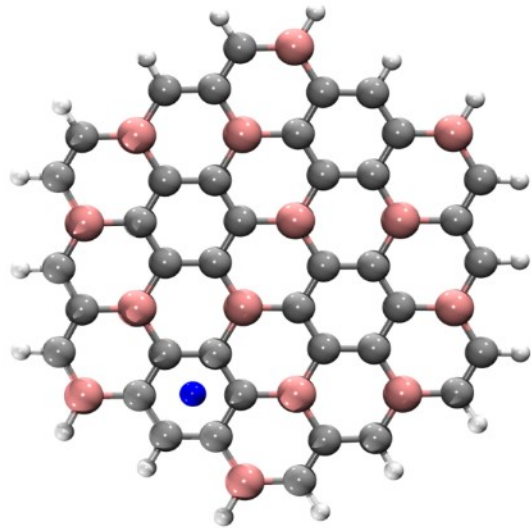

**Na@BC-F**

**Na@BC nanosheet**

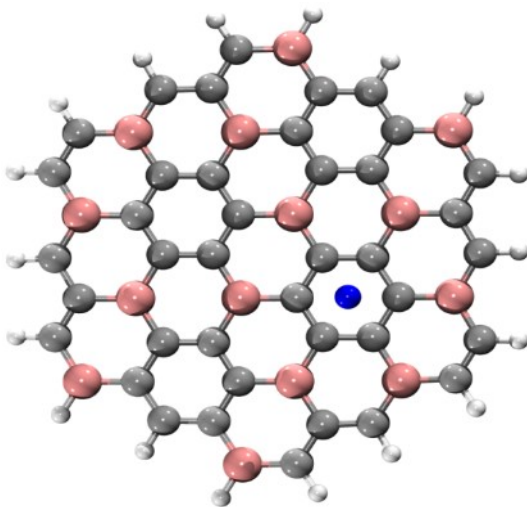

**Na@BC-G**

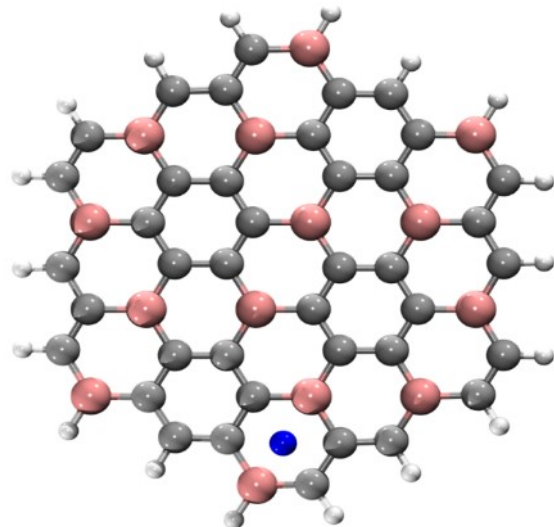

**Na@BC-H**

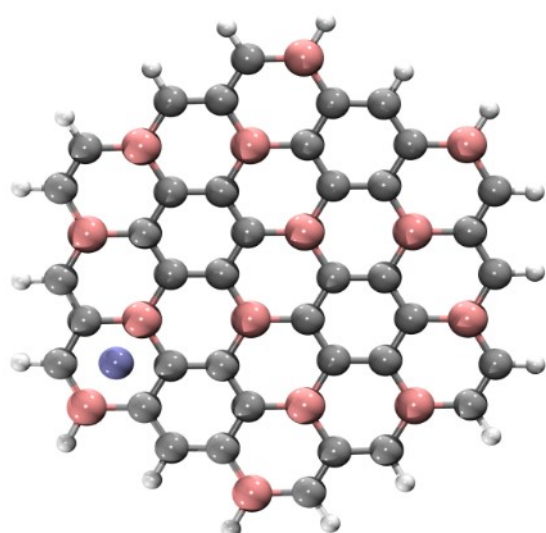

**K@BC-J**

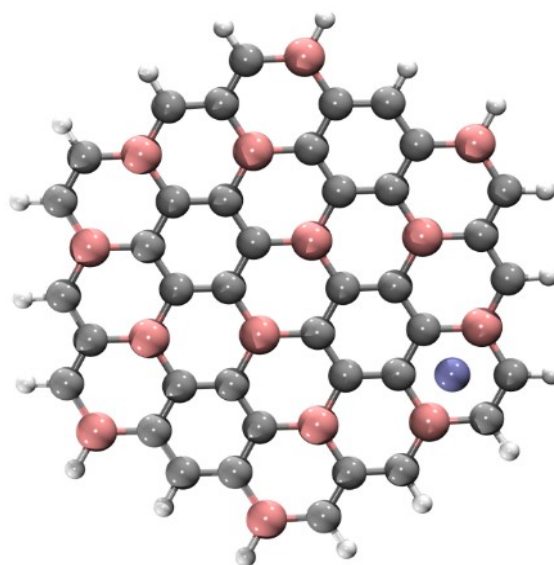

**K@BC-K**

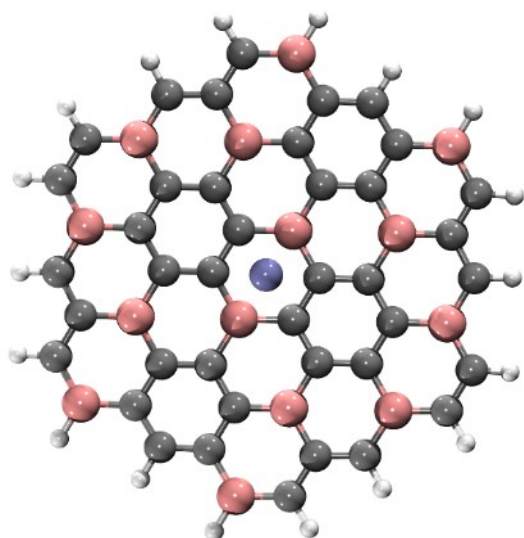

**K@BC-L**

**Fig.S1.** Optimized structures of BC nanosheet doped with alkali metals Li@BC (B-D), Na@BC (F-H) and K@BC (J-L)

**Li@BC nanosheet**

**HOMO**

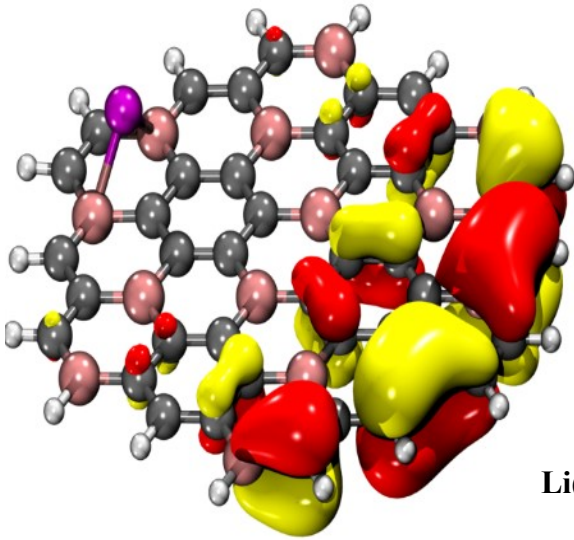

**LUMO**

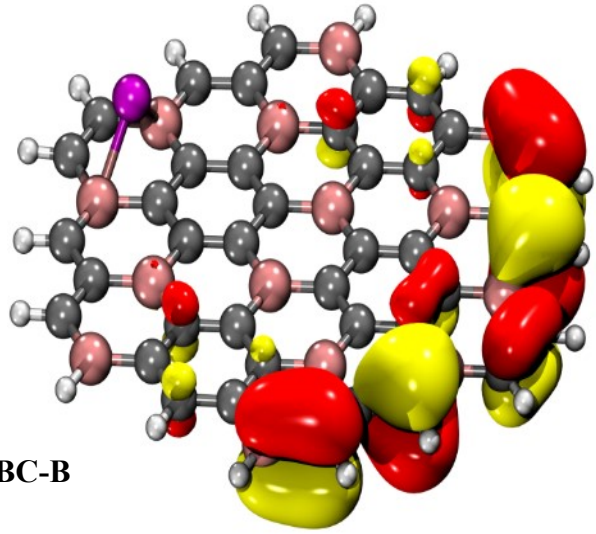

**Li@BC-B**

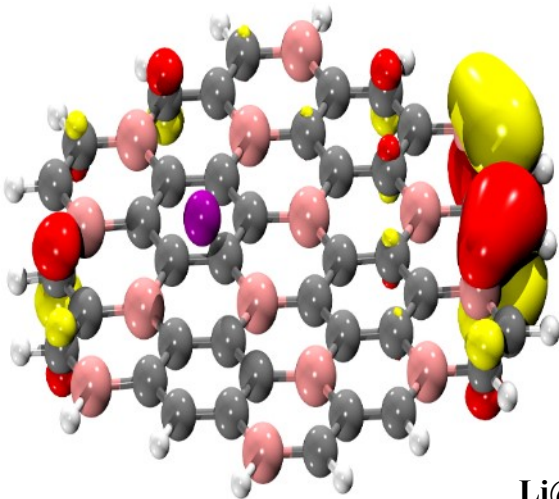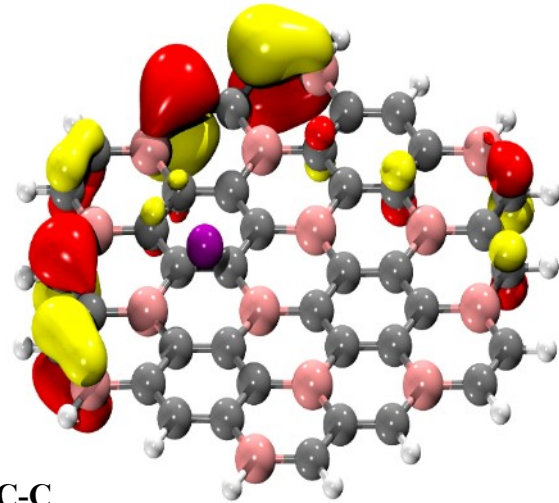

**Li@BC-C**

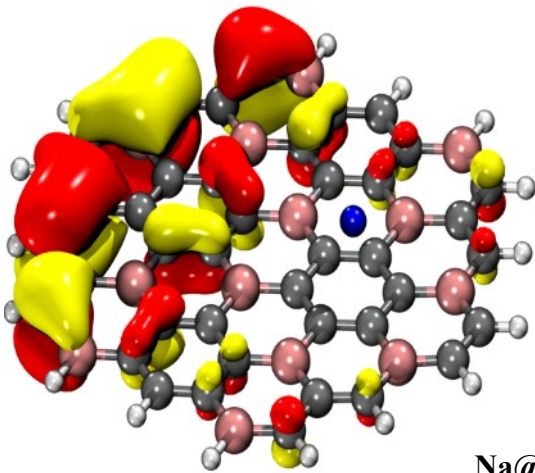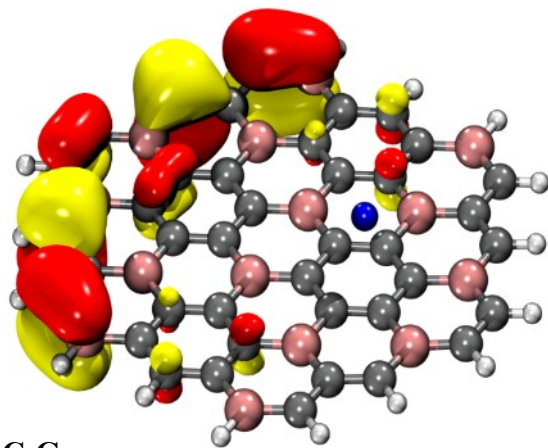

**Na@BC-G**



**Na@BC nanosheet**

**HOMO**

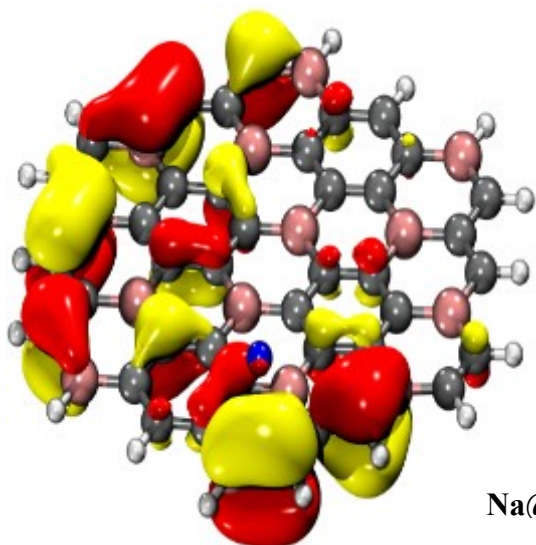

**LUMO**

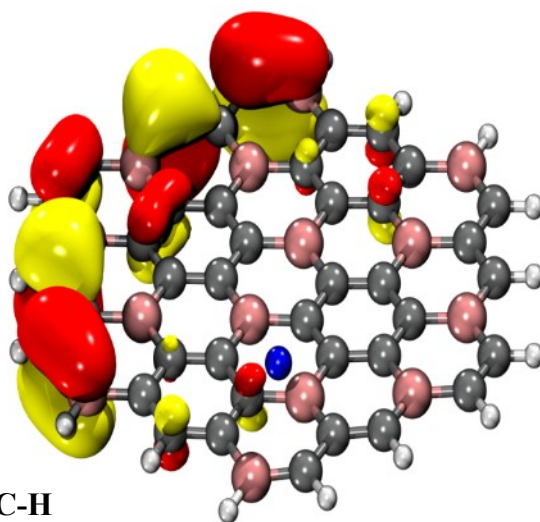

**Na@BC-H**

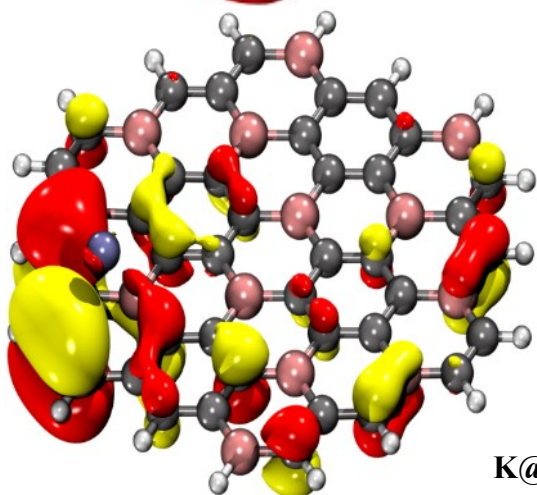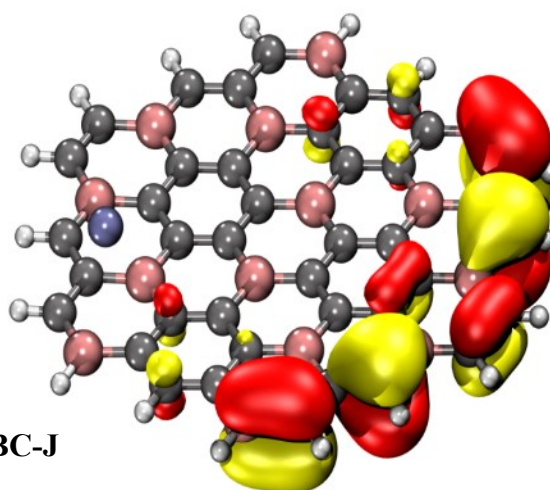

**K@BC-J**

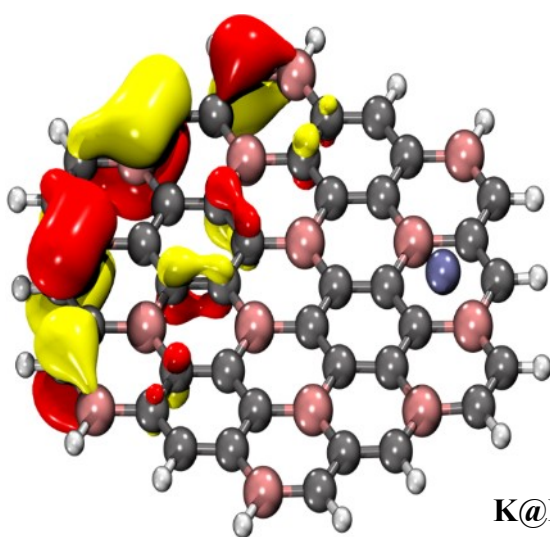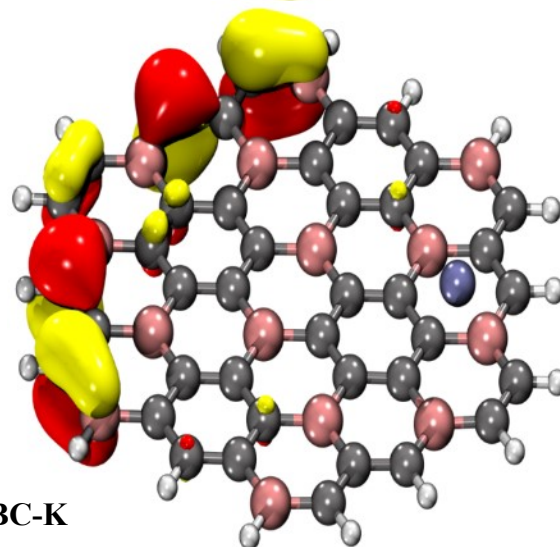

**K@BC-K**

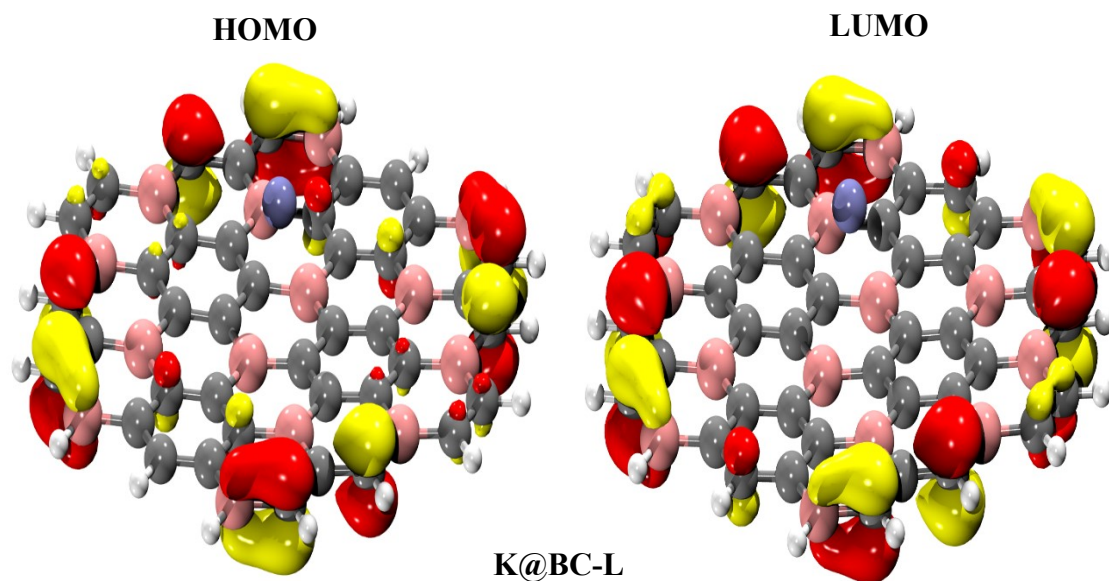

**Fig.S2.** HOMO and LUMO of BC nanosheet doped with alkali metals Li@BC (B-D), Na@BC (F-H) and K@BC (J-L)

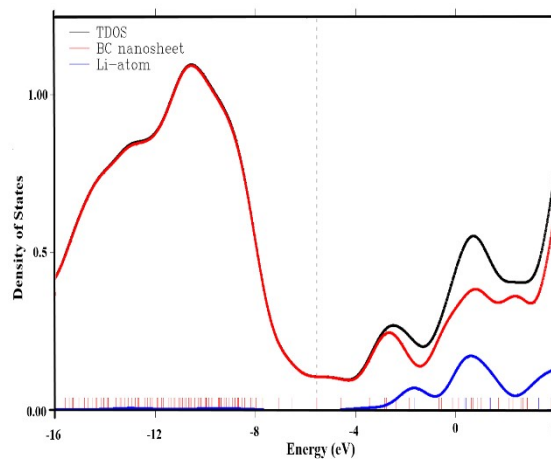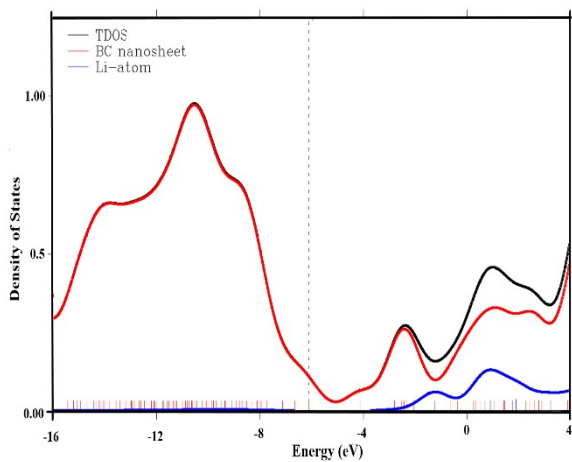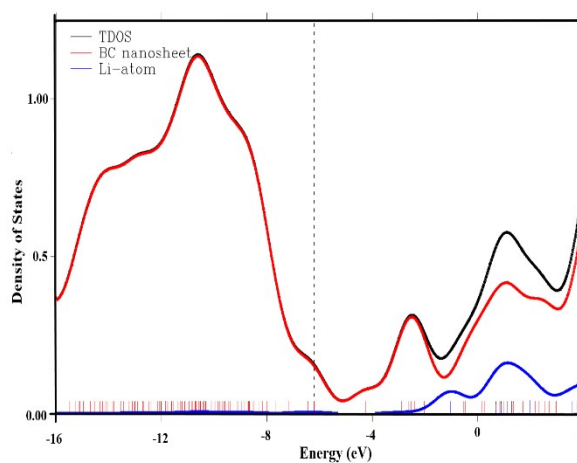

**Li@BC-B**

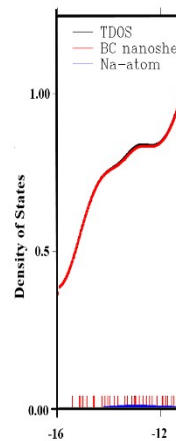

**Li@BC-D**

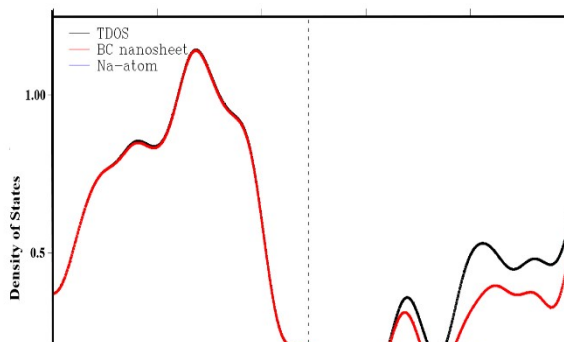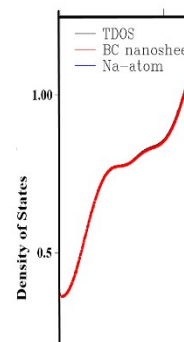

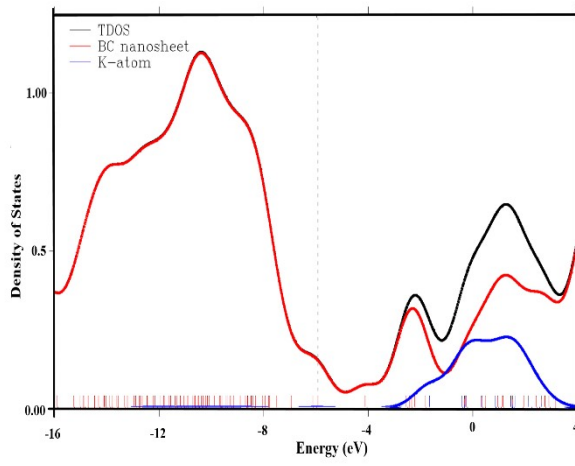

**K@BC-J**

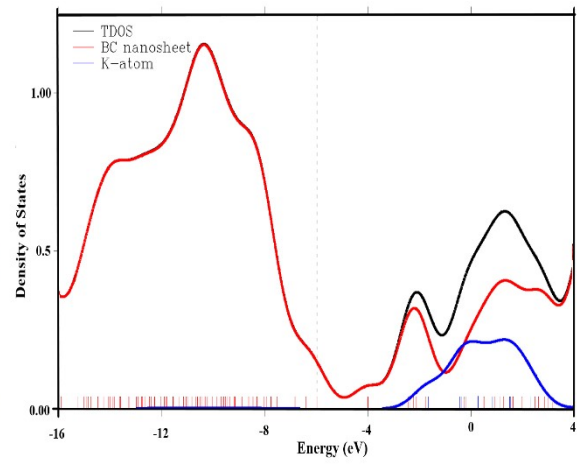

**K@BC-K**

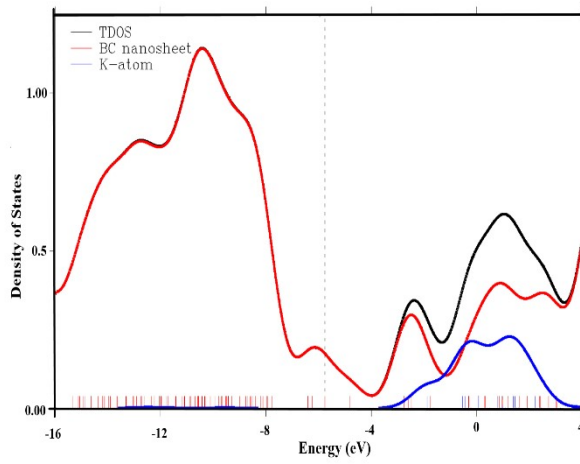

**K@BC-L**

**Fig.S3.** PDOS and TDOS of BC nanosheet doped with alkali metals Li@BC (B-D), Na@BC (F-H) and K@BC (J-L)



**3D-isosurface**

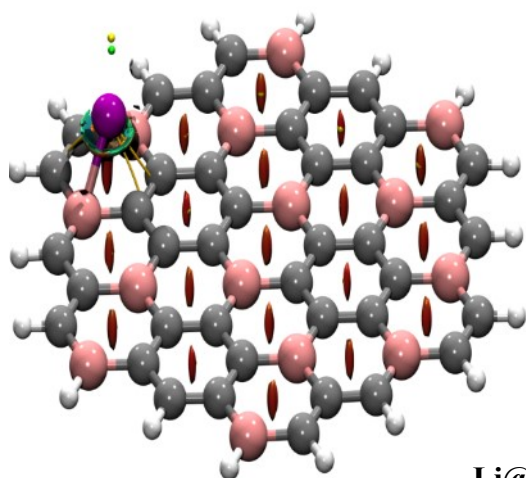

**Li@BC-B**

**2D-RDG**

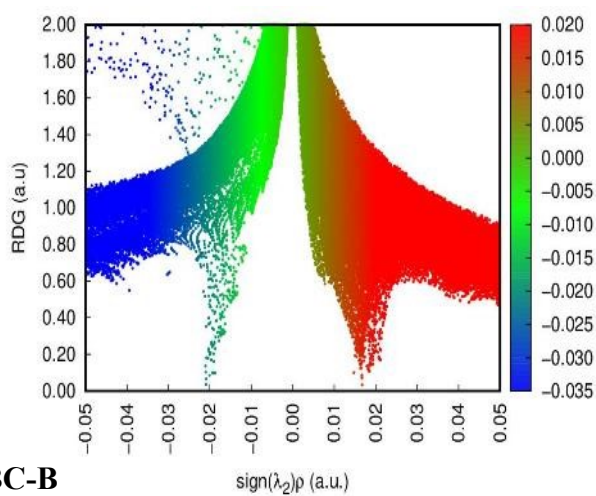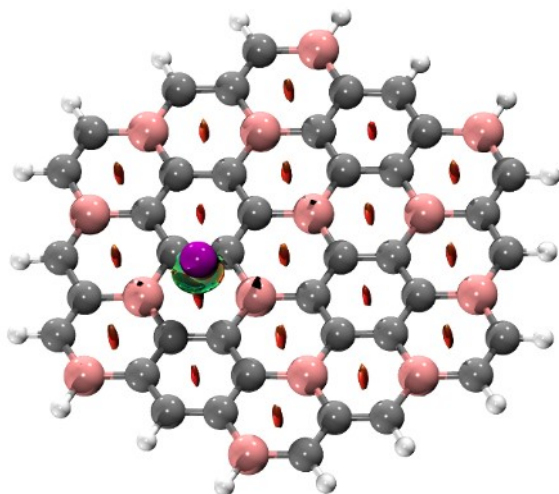

**Li@BC-C**

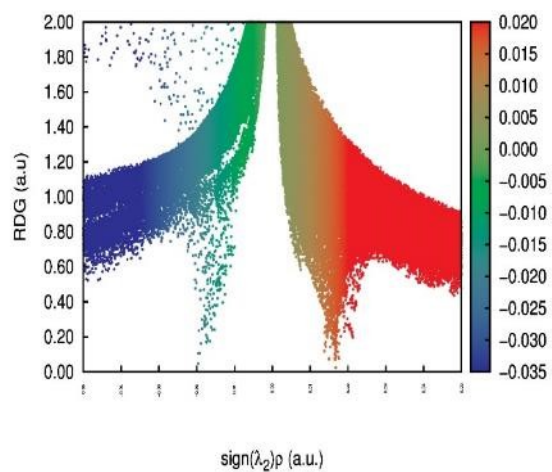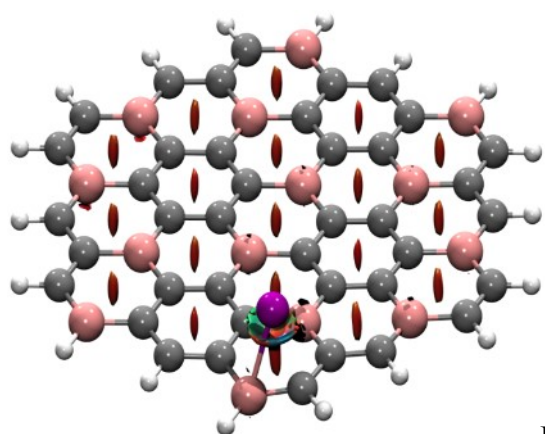

**Li@BC-D**

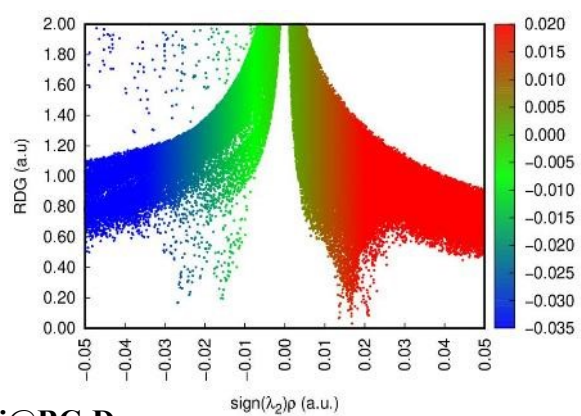

**3D-isosurface**

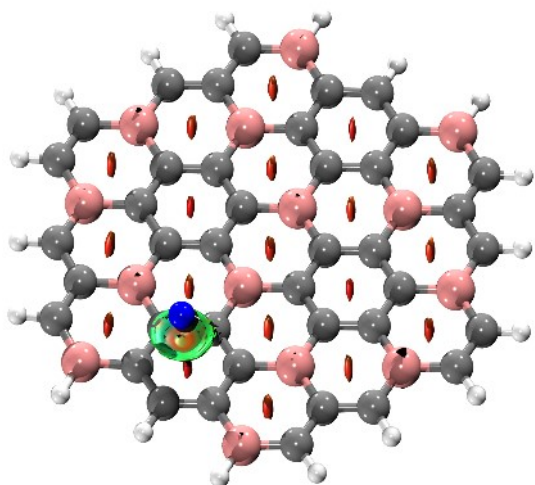

**2D-RDG**

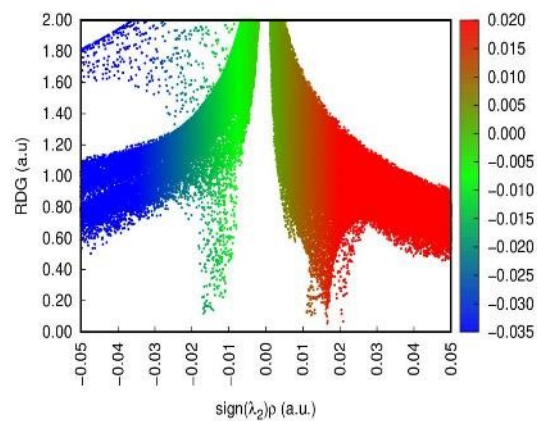

**Na@BC-F**

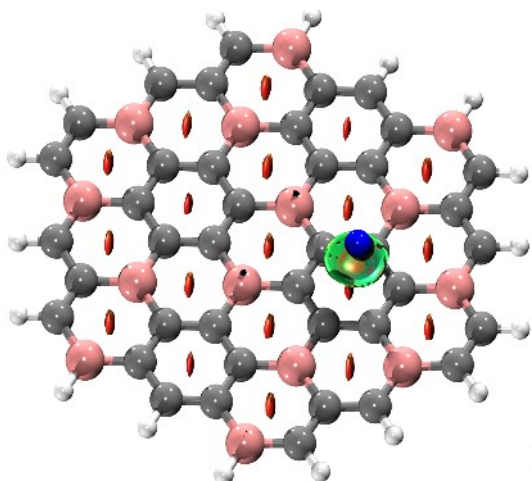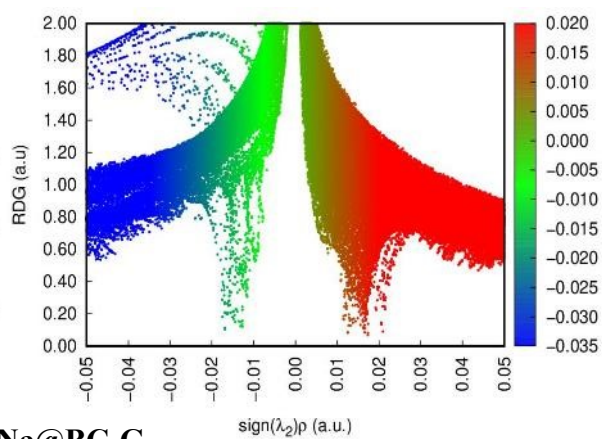

**Na@BC-G**

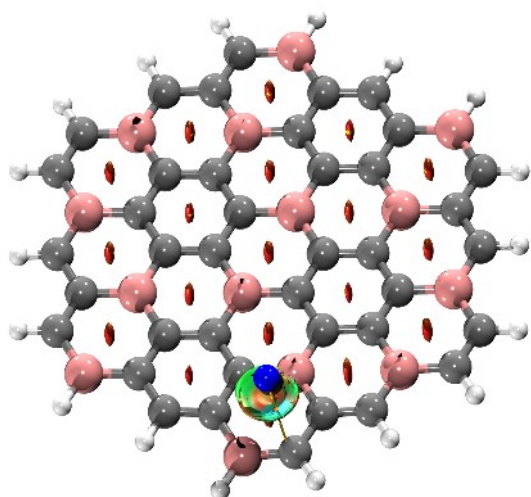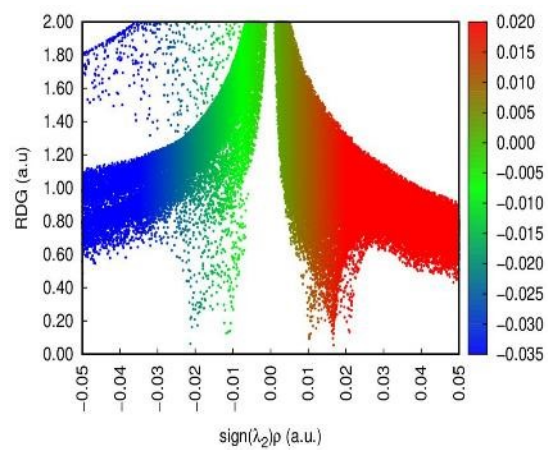

**Na@BC-H**



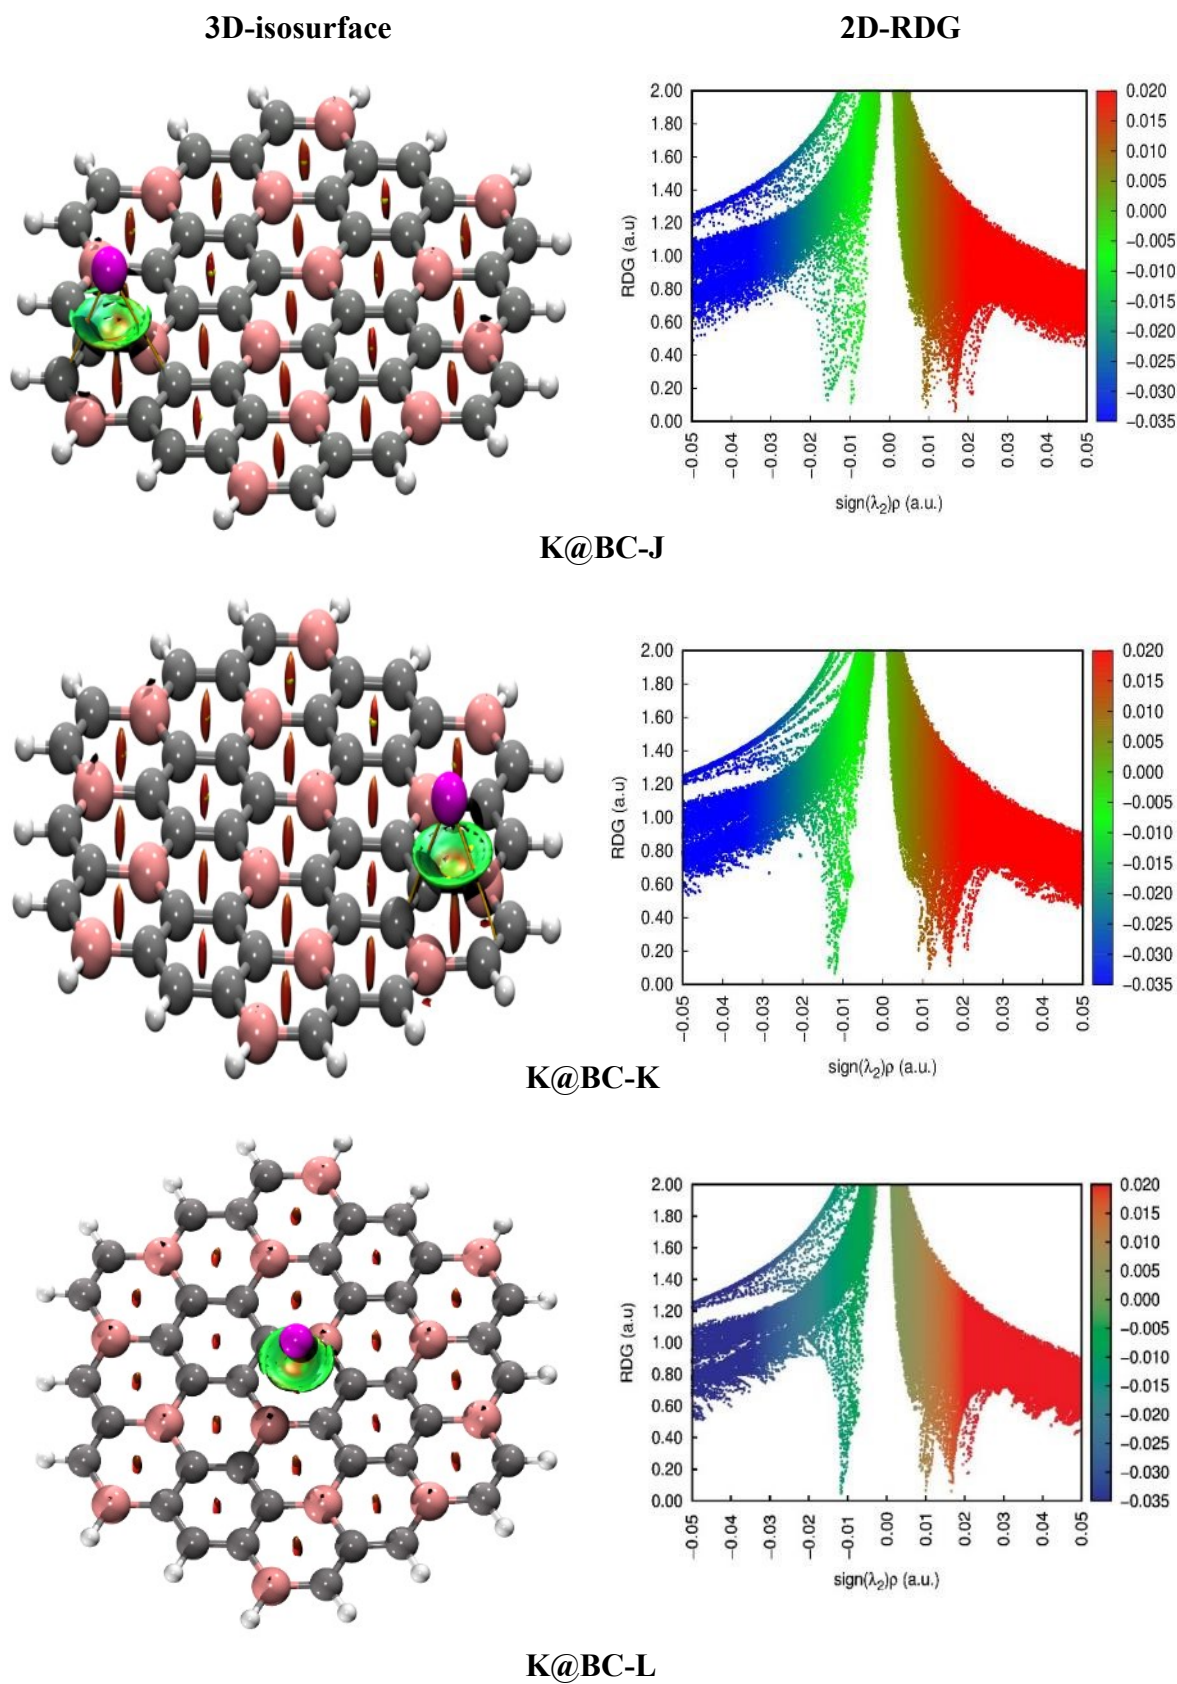

**Fig.S4.** NCI analysis (3D-isosurface and 2D-RDG graphs) of BC nanosheet doped with alkali metals Li@BC (B-D), Na@BC (F-H) and K@BC (J-L) isomers

**Li@BC nanosheet**

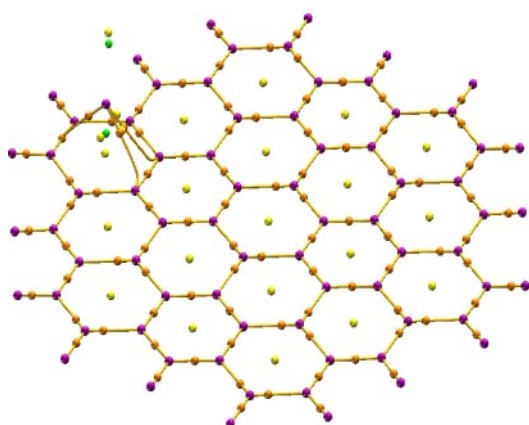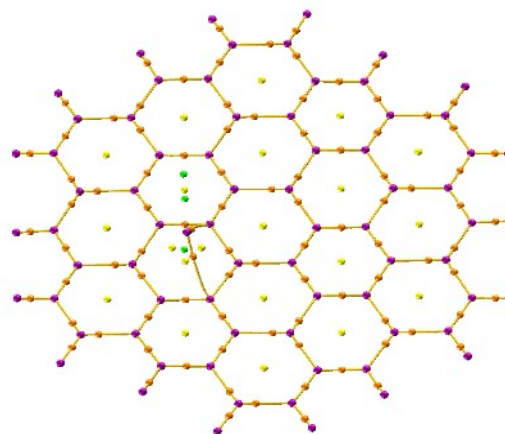

**Li@BC-B**

**Li@BC-C**

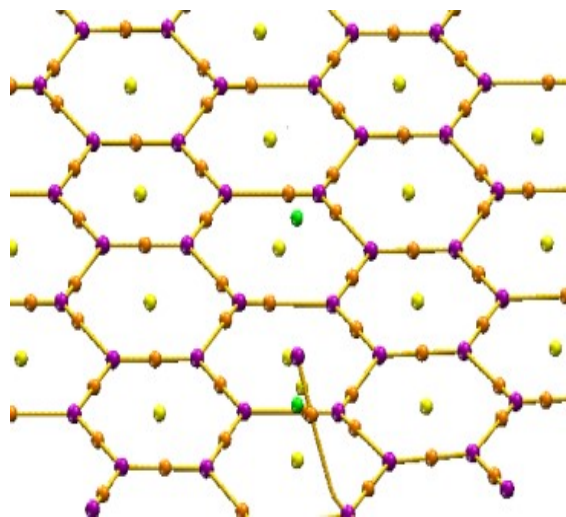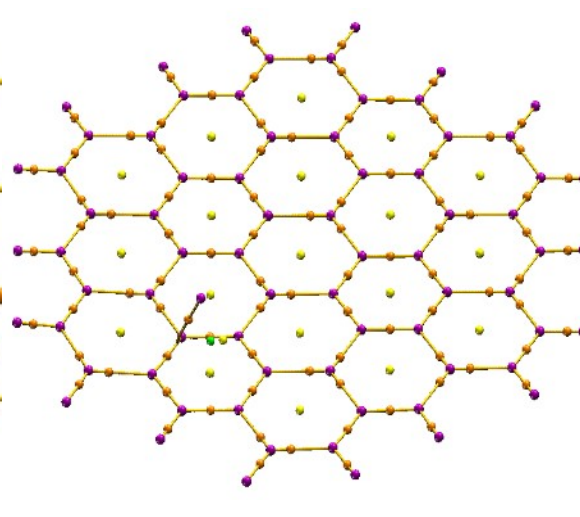

**Li@BC-D**

**Na@BC-F**

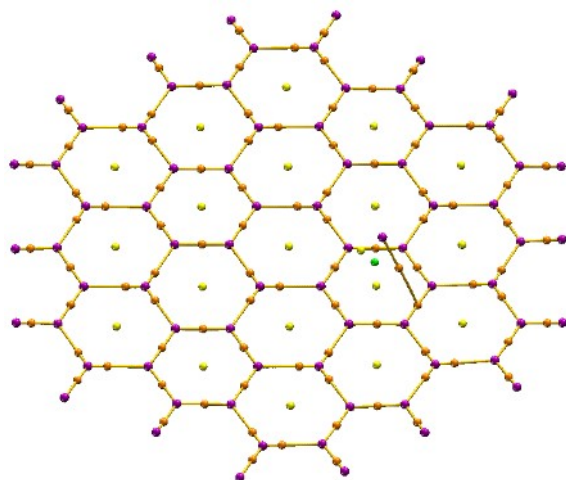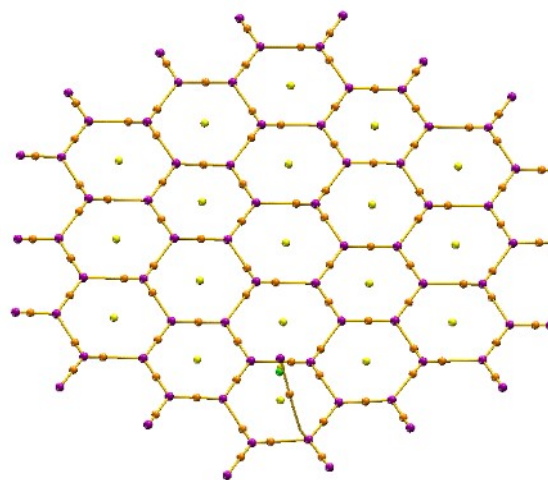

**Na@BC-G**

**Na@BC-H**



**Na@BC nanosheet**

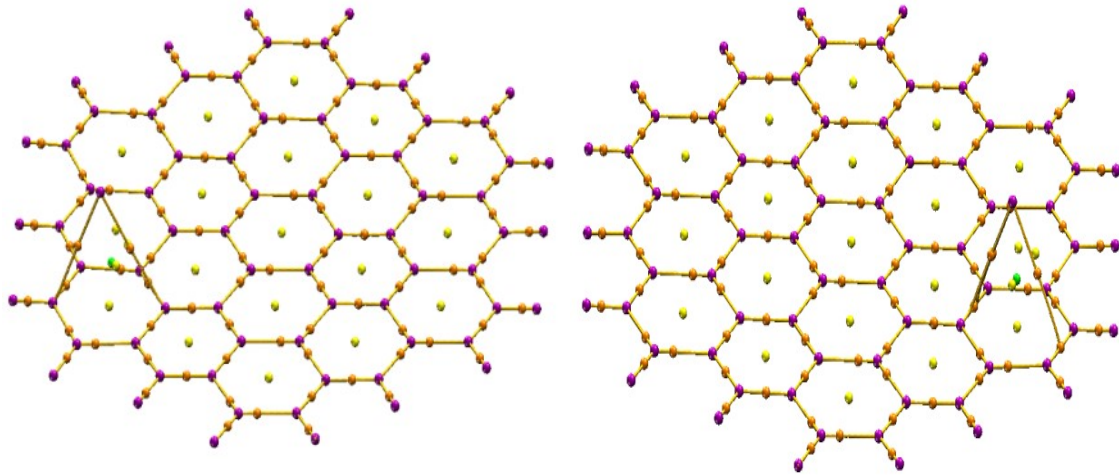

**K@BC-J**

**K@BC-K**

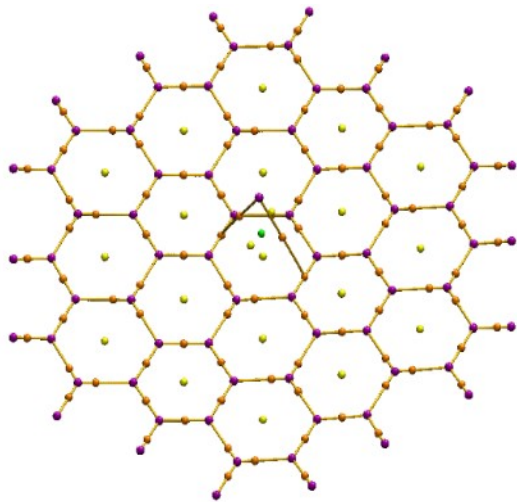

**K@BC-L**

**Fig.S5.** QTAIM topological structures of BC nanosheet doped with alkali metals Li@BC (B-D), Na@BC (F-H) and K@BC (J-L) isomers

**Table S1:** Comparison table of previously reported  $\beta_o$  values to the current study

| Sr No. | Complex                                  | Level of Theory     | Maximum $\beta_o$ values (au) | References    |
|--------|------------------------------------------|---------------------|-------------------------------|---------------|
| 1      | Li@BC-C                                  | M062X/6-31G(d,p)    | $3.11 \times 10^5$            | Current study |
| 2      | Para-nitroaniline ( <i>p</i> -NA)        | M062X/6-31G(d,p)    | $1.0 \times 10^3$             | [1]           |
| 3      | Alkali metal doped Al-BN/P-BN nanosheets | M062X/6-31+G(d)     | $6.1 \times 10^4$             | [2]           |
| 4      | M@SiCNs                                  | B3LYP/6-31g(d)      | $7.7 \times 10^4$             | [3]           |
| 5      | M@GeC nanoflakes                         | M062X/6-31G(d,p)    | $3.4 \times 10^4$             | [4]           |
| 6      | K-exo-R6                                 | M062X/6-311++G(d,p) | $4.2 \times 10^3$             | [5]           |
| 7      | K@C <sub>2</sub> N                       | B3LYP/6-31G(d,p)    | $8.02 \times 10^4$            | [6]           |

**References:**

- [1] S. Muhammad, R.A. Shehzad, J. Iqbal, A.G. Al-Sehemi, M. Saravanabhavan, M. Khalid, Benchmark study of the linear and nonlinear optical polarizabilities in proto-type NLO molecule of para-nitroaniline, *Journal of Theoretical and Computational Chemistry* 18(06) (2019) 1950030.
- [2] N. Hou, Y. Wu, H. Wu, The Influence of Alkali metals Interaction with Al/P-Substituted BN Nanosheets on Their Electronic and Nonlinear Optical Properties: A DFT Theoretical Study, *ChemistrySelect* 4(4) (2019) 1441-1447.
- [3] J. Yaqoob, T. Mahmood, K. Ayub, S. Tabassum, A.F. Khan, S. Perveen, J. Yang, M.A. Gilani, Optimized nonlinear optical (NLO) response of silicon carbide nanosheet by alkali metals doping: a DFT insight, *Eur. Phys. J. Plus* 137(2) (2022) 233.
- [4] J. Yaqoob, S. Tabassum, T. Mahmood, K. Ayub, A.L. Khan, M. Yasin, R. Nawaz, M.A. Gilani, A Rational Design of Alkali Metal-Doped Germanium Carbide Nanoclusters for High Nonlinear Optical Response and Ultraviolet Transparency, *JOM* 75(12) (2023) 5893-5908.
- [5] S. Abdolahi Joneghani, Z. Biglari, A. Gholipour, Alkali Metal Doping for Enhancement of Nonlinear Optical Properties of Dicyclopenta[4,3,2,1-ghi:4',3',2',1'-pqr]perylene: A New Bowl-Shaped Fragment of Fullerene C<sub>70</sub>, *Journal of Inorganic and Organometallic Polymers and Materials* 31(2) (2021) 648-658.
- [6] W. Akram, E. Nadeem, K. Ayub, J. Iqbal, M.S. Al-Buriahi, S. Alomairy, K.M. Katubi, A.A. Ibraheem, Enhanced non-linear optical response of alkali metal-doped nitrogenated holey graphene (C<sub>2</sub>N), *Journal of Molecular Structure* 1267 (2022) 133580.
